# Supplementary material for: On the gelation of humins: from transient to covalent networks
Source: Royal Society of Chemistry journal article supplement (doi:10.1039/d2sm01506d), 2023-01-01
Supplement: d2sm01506d1.pdf [file d2sm01506d1.pdf]

## Supplementary Information:

### On the gelation of humins: From transient to covalent networks

Kenneth Cerdan<sup>1\*</sup>, Jesus Gandara-Loe<sup>2</sup>, Giel Arnauts<sup>2</sup>, Vedran Vangramberen<sup>1</sup>, Anton Ginzburg<sup>3</sup>, Rob Ameloot<sup>2</sup>, Erin Koos<sup>1</sup>, Peter Van Puyvelde<sup>1</sup>

<sup>1</sup> Department of Chemical Engineering, Soft Matter, Rheology and Technology (SMaRT), KU Leuven, Celestijnenlaan 200J, 3001 Heverlee, Belgium

<sup>2</sup> Department of Microbial and Molecular Systems, Centre for Membrane Separation, Adsorption, Catalysis and Spectroscopy, KU Leuven, Celestijnenlaan 200J, 3001 Heverlee, Belgium

<sup>3</sup> Department of Chemical Engineering, Soft Matter, Rheology and Technology (SmaRT), Wetenschapspark 27, 3590 Diepenbeek, Belgium

\* Corresponding author: [Kenneth.cerdangomez@kuleuven.be](mailto:Kenneth.cerdangomez@kuleuven.be)

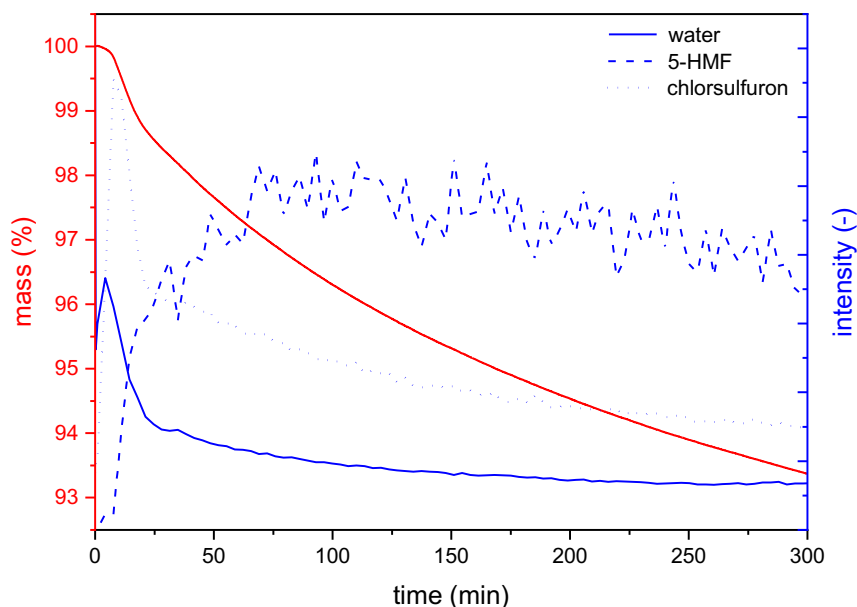

**Figure S1.** Control TGA (red)-MS (blue) experiment of humins. Water ( $m/z = 18$ ), HMF ( $m/z = 97$ ) and chlorsulfuron ( $m/z = 111$ ) intensities are displayed after normalization.

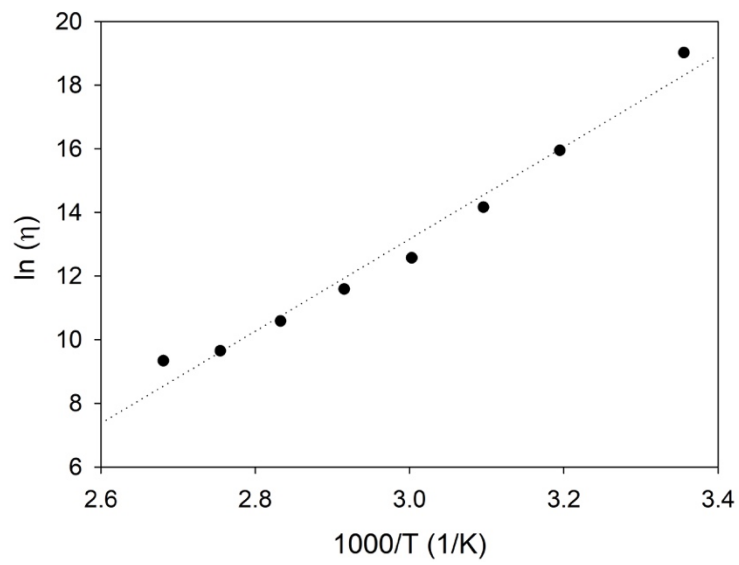

**Figure S2.** Arrhenius plot showing the temperature dependence of the shear viscosity.

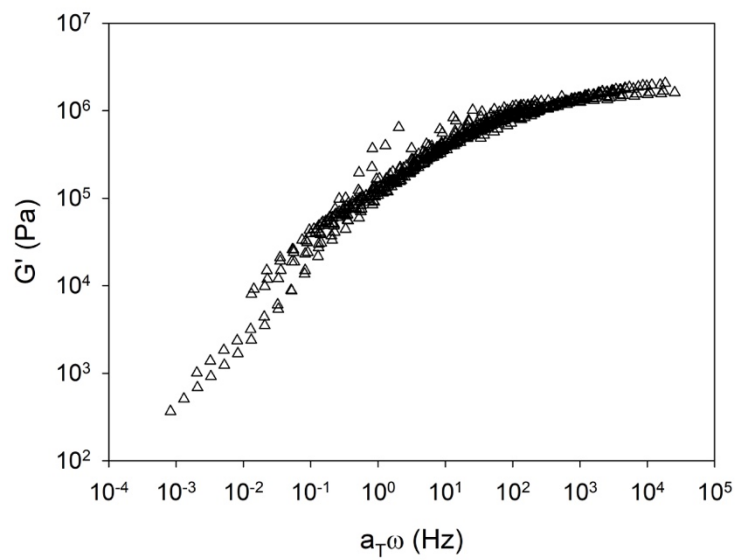

**Figure S3.** Rheological master curve at 60 °C, 80 °C and 100 °C by applying a time-temperature / time-curing superposition.
